# Supplementary material
Source: Springer Nature journal article supplement (https://www.springermedizin.de/resource/supplementary/12967_2011_828_MOESM9_ESM.pdf/9577140)

A.

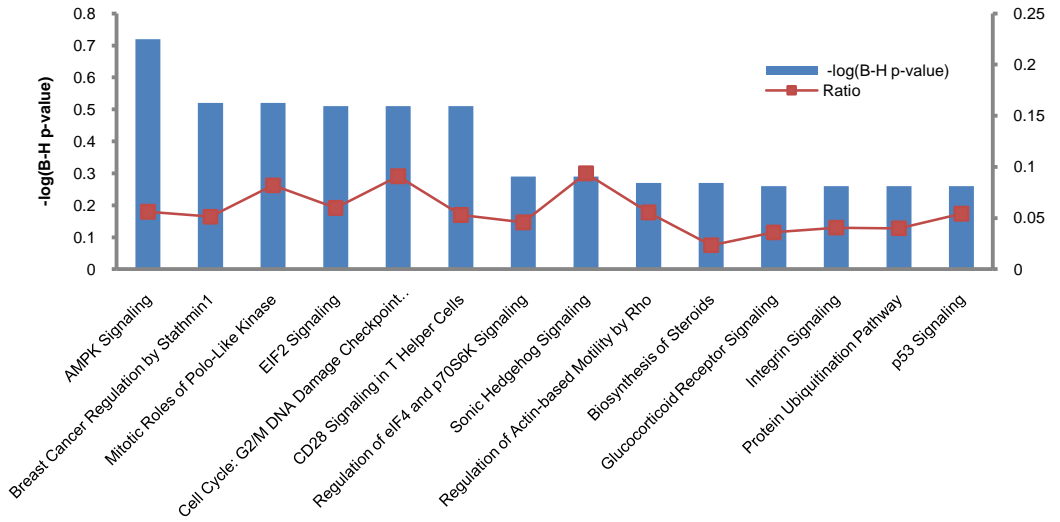

B.

Antigen presenting cell

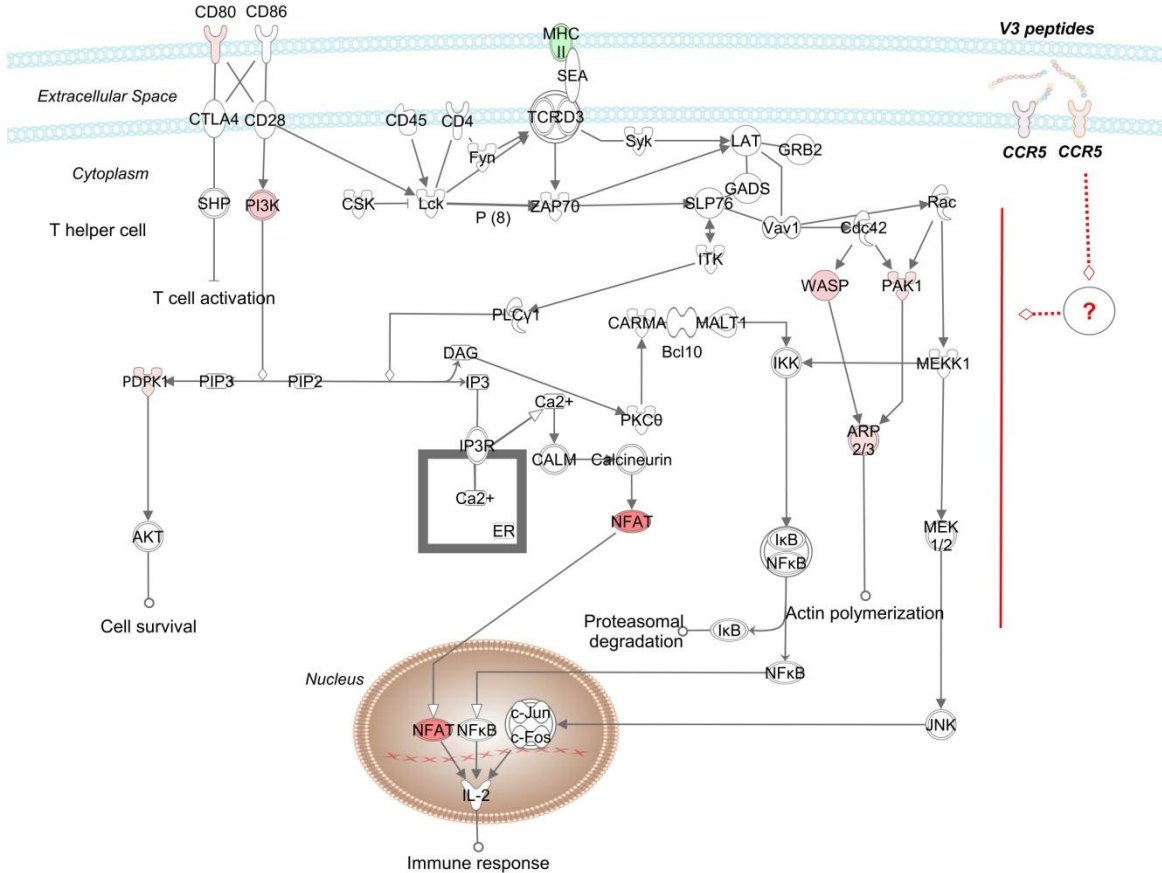

Supplement: MOESM9 [file 9577140]
